# Supplementary material
Source: Springer Nature journal article supplement (https://www.springermedizin.de/resource/supplementary/12879_2012_2395_MOESM3_ESM.pdf/9444488)

$A_S = 0$   
 $A_p = 100\%$   
 $A_d = [14,21]$

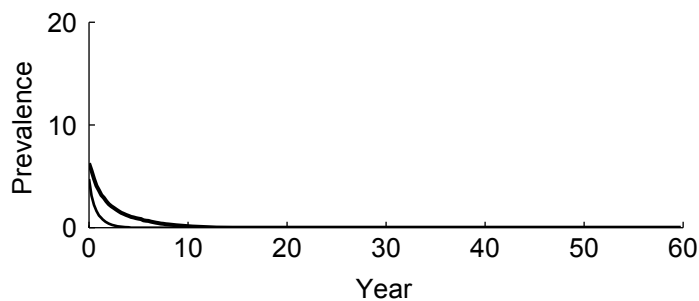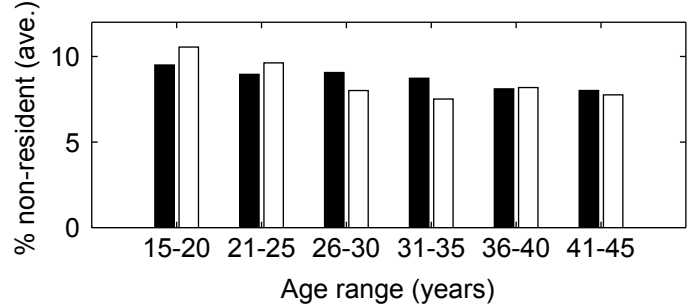

$A_S = 0.2$   
 $A_p = 100\%$   
 $A_d = [14,21]$

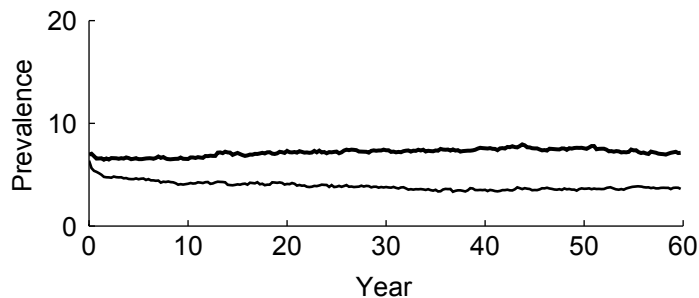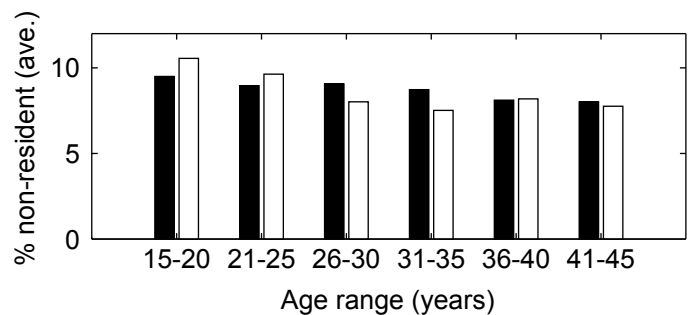

$A_S = 0.2$   
 $A_p = 20\%$   
 $A_d = [14,21]$

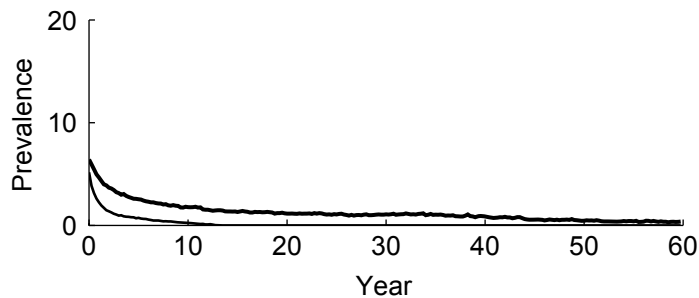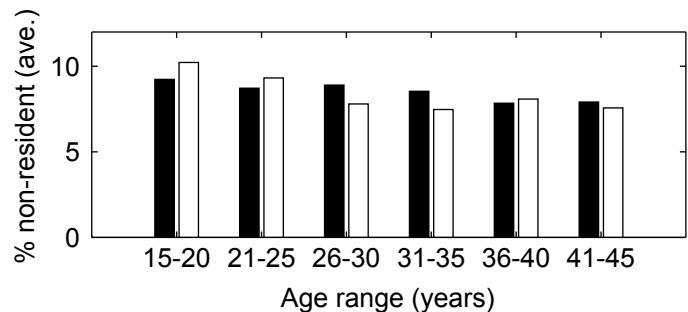

$A_S = 0.2$   
 $A_p = 100\%$   
 $A_d = [14,28]$

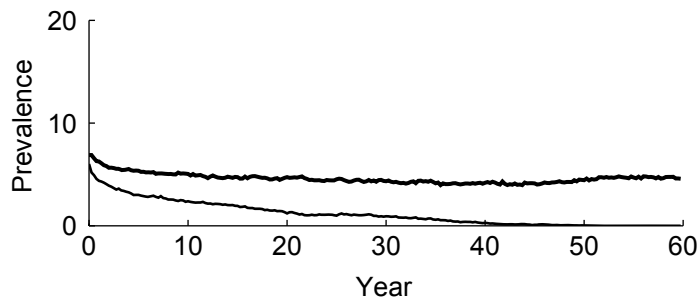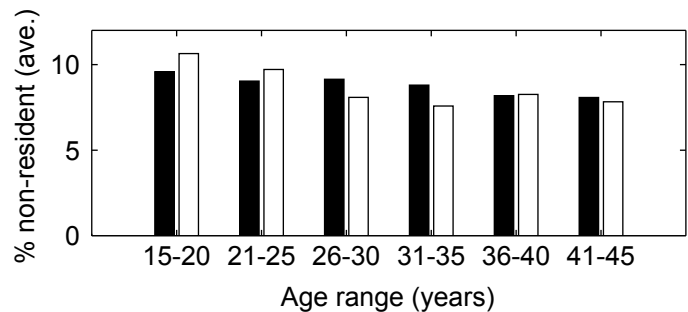

Supplement: MOESM3 [file 9444488]
